# Supplementary material for: Inter-individual genomic heterogeneity within European population isolates
Source: PubMed Central journal article supplement (PMC6785074; doi:10.1371/journal.pone.0214564), 2019-10-09

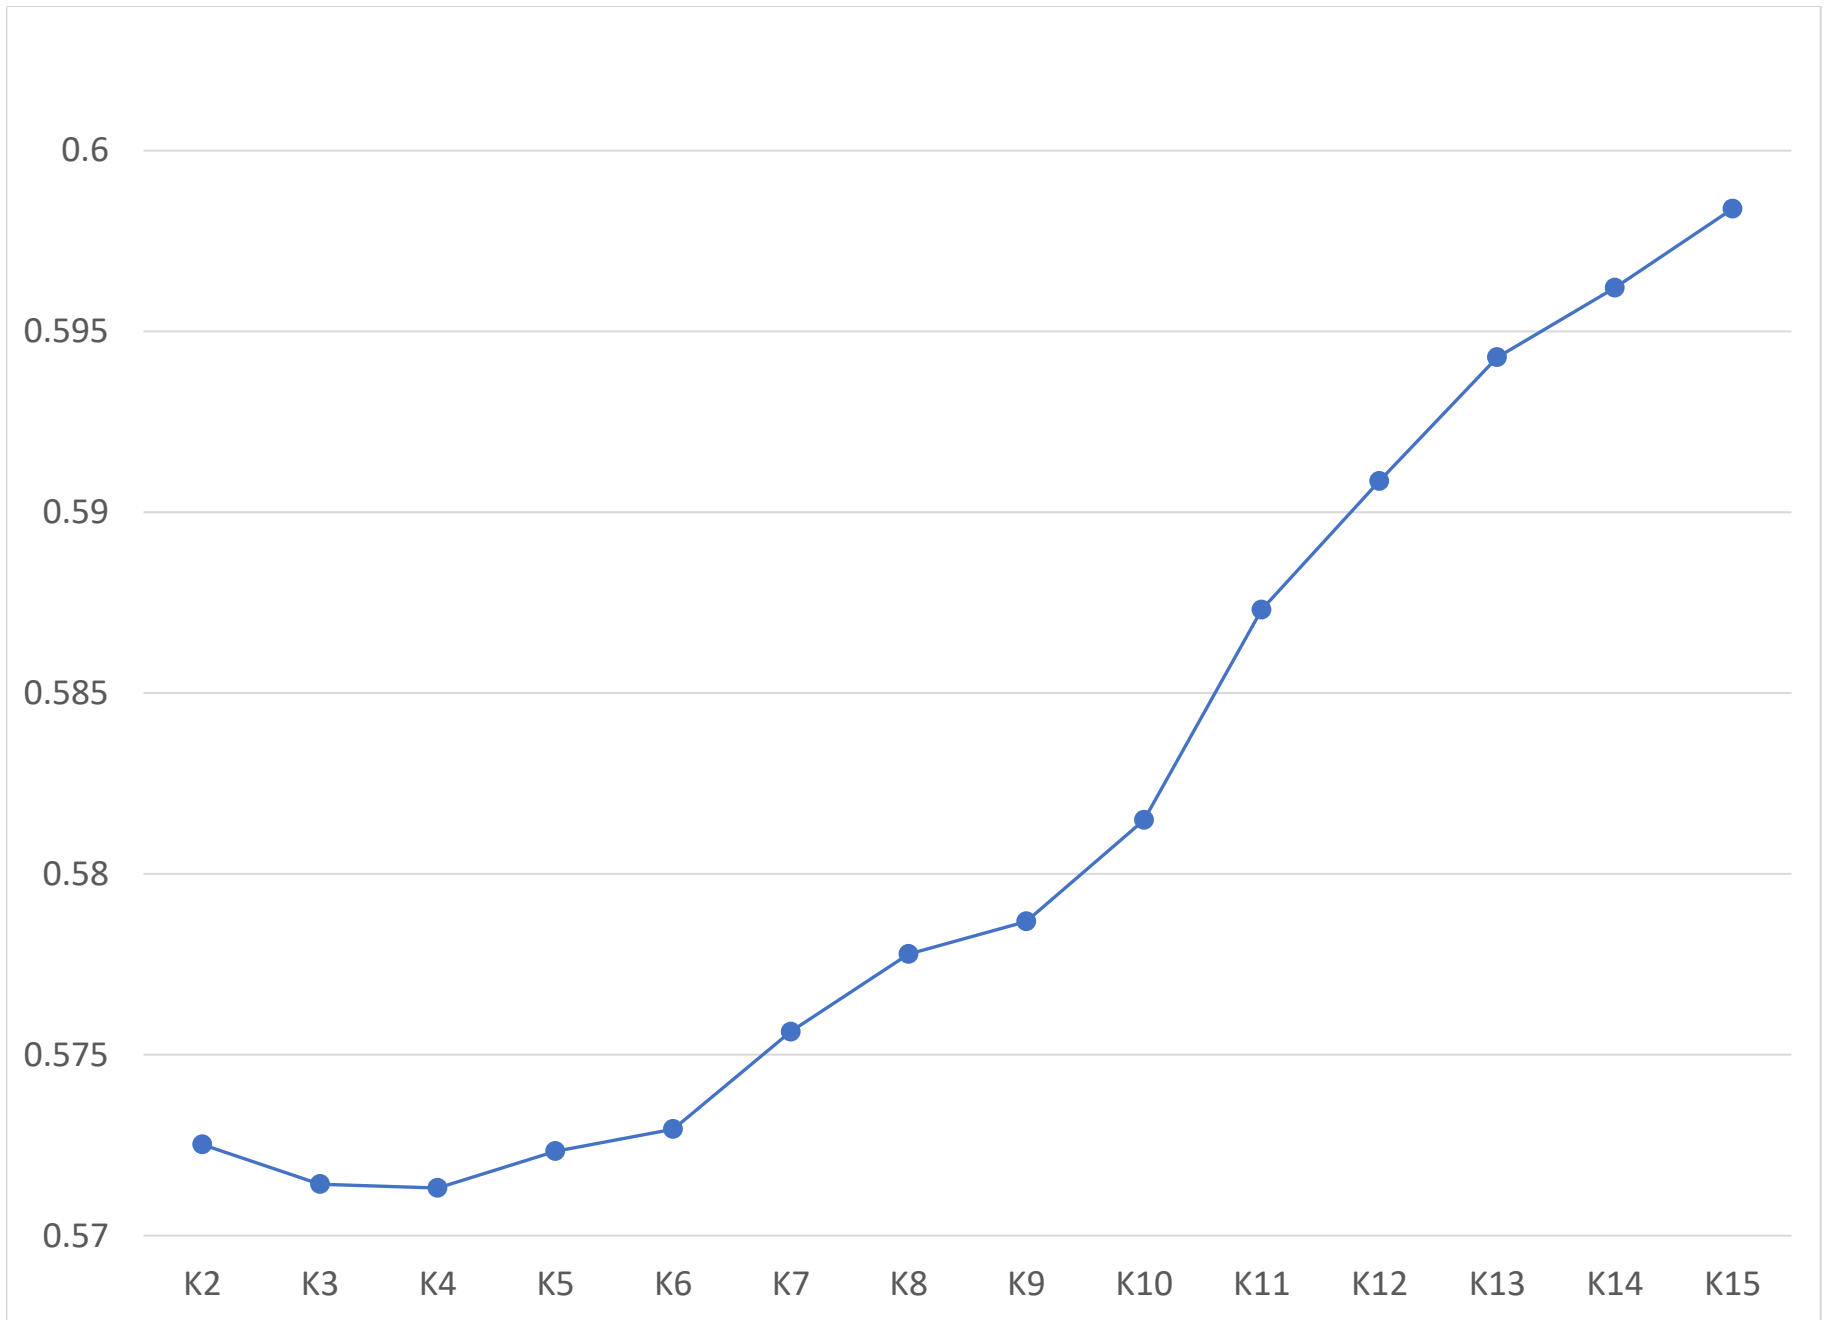

Supplement: pone.0214564.s001.pdf [file pone.0214564.s001.pdf]
