# Supplementary material for: Inter-individual genomic heterogeneity within European population isolates
Source: PubMed Central journal article supplement (PMC6785074; doi:10.1371/journal.pone.0214564), 2019-10-09
Supplement: pone.0214564.s002.pdf [file pone.0214564.s002.pdf]

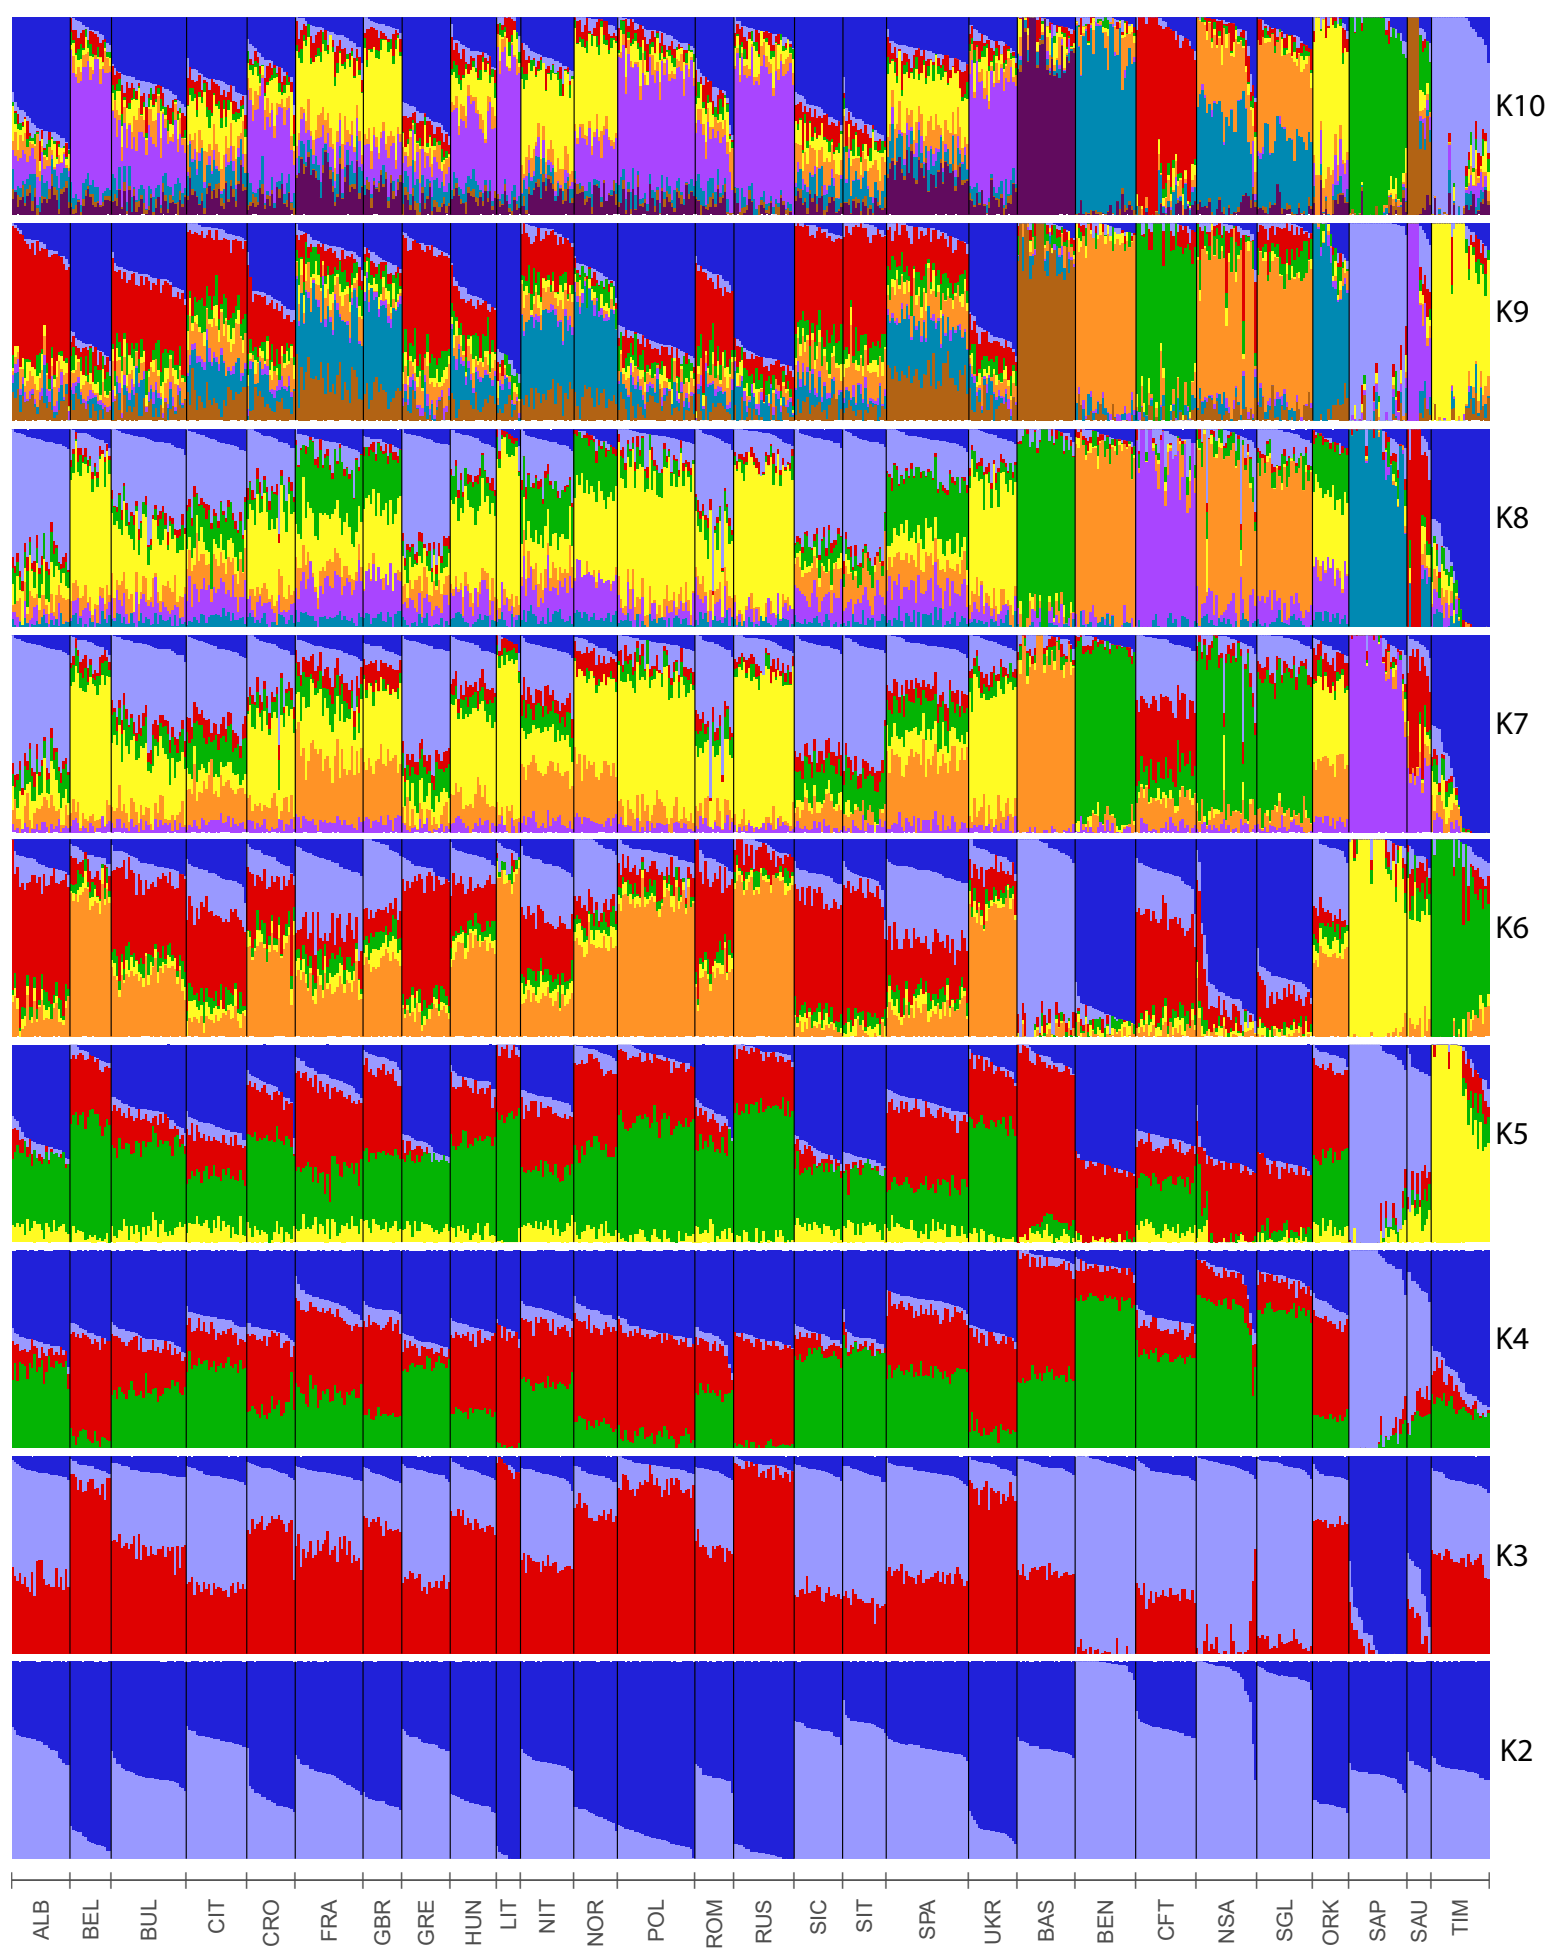

K10

K9

K8

K7

K6

K5

K4

K3

K2

ALB BEL BUL CIT CRO FRA GBR GRE HUN LIT NIT NOR POL ROM RUS SIC SIT SPA UKR BAS BEN CFT NSA SGL ORK SAP SAU TIM
